# Supplementary material for: The Radiation of Landhoppers (Crustacea, Amphipoda) in New Zealand
Source: Preprints.org preprint supplement (doi:10.20944/preprints202408.1414.v1), 2024-08-21
Supplement: Supplementary file 1 [file supplementary]

**Supplementary Table 1.** Specimens used for genetic analyses, their collection locality and Genbank accession number.

| **Taxon** | **Location name (Crosby area)** | **GenBank Accessions** |
| --- | --- | --- |
| **16S** |
| **Arcitalitridae** |  |  |
| *Kanikania longicornis* (Stephensen, 1938) | Papatowai (Southland) | PP407053 |
| *Kanikania motuensis* Duncan, 1994 | Rakeahua (Stewart Island) | PP407050 |
| *Kanikania* sp. nov. 1 | Tin Range (Stewart Island) | PP407048 |
| Genus A sp. nov. 1 | Kohuroa, Te Paki Ecological District (Northland) | PQ154944 |
| Genus A sp. nov. 2 | Unuwhao, Te Paki Ecological District (Northland) | PQ154943 |
| Genus A sp. nov. 3 | Great Island (Three Kings Islands) | PQ154915 |
| Genus A sp. nov. 4 | North Cape (Northland) | PQ154916 |
| Genus A sp. nov. 5 | Bushy Park (Whanganui) | PQ154914 |
| Genus L sp. nov. 1 | Scott’s Beach, Kahurangi (Nelson) | PQ154939 |
| **Talitridae** |  |  |
| *Bellorchestia quoyana* (Milne Edwards, 1884) | Waipu (Northland) | PQ154945 |
| *Dallwitzia simularis* (Hurley, 1957) | North East Island (Snares Islands) | PQ154940 |
| Genus N sp. nov. 1 | North East Island (Three Kings Islands) | PQ154917 |
| *Subantarctorchestia aucklandiae* (Spence Bate, 1862) | Stack Bay (Antipodes Island) | PQ154942 |
| *Tatahipeke tumida* (Stebbing 1887) | Kaimaumau (Northland) | PQ154946 |
| **Makawidae** |  |  |
| *Dana hauturu* (Duncan, 1994) | Little Barrier Island (Coromandel) | PP407063 |
| *Dana sylvicola* (Dana, 1852) | Warawara Forest (Northland) | PP407059 |
| *Dana taranaki* (Duncan, 1994) | Dawson Falls, Mt Taranaki (Taranaki) | PP407062 |
| *Deshurleyella kohuroa* (Ball, Webber, Shepherd, 2017) | Unuwhao, Te Paki Ecological District (Northland) | KU896874 |
| *Deshurleyella reinga* (Duncan, 1994) | Kohuroa, Te Paki Ecological District (Northland) | KU896868 |
| *Deshurleyella rereke* (Ball, Webber, Shepherd, 2017) | Unuwhao, Te Paki Ecological District (Northland) | KU896875 |
| *Deshurleyella ringanohinohi* (Ball, Webber, Shepherd, 2017) | Radar Bush, Te Paki Ecological District (Northland) | PQ154947 |
| *Deshurleyella* sp. nov. 1 | Broadwood (Northland) | PQ154935 |
| *Kohuroa kaitaia* (Duncan, 1994) | Bream Head, Whangārei (Northland) | KU896879 |
| *Kohuroa muriwhenua* (Duncan, 1994) | Radar Bush, Te Paki Ecological District (Northland) | KU896867 |
| *Makawe hurleyi* (Duncan, 1968) | Riccarton Bush, Christchurch (Mid Canterbury) | PQ154896 |
| *Oamaru otamatuakeke* (Duncan, 1994) | Oamaru (Dunedin) | PQ154930 |
| *Omaiorchestia rubroannulata* (Hurley, 1957) | Limestone Island, Whangārei (Northland) | PP407071 |
| *Omaiorchestia unuwhao* (Duncan, 1994) | Radar Bush, Te Paki Ecological District (Northland) | PP407074 |
| *Omaiorchestia* sp. nov. 1 | North East Island (Three Kings Islands) | PP407073 |
| *Omaiorchestia* sp. nov. 2 | Kamo, Whangārei (Northland) | PP407070 |
| *Parorchestia ihurawao* Duncan, 1994 | Hampden (Dunedin) | PQ154899 |
| *Parorchestia tenuis* (Dana, 1852) | Limestone Island, Whangārei (Northland) | KU896865 |
| *Parorchestia* sp. nov. 1 | Kaituna (Nelson) | PQ154890 |
| *Parorchestia* sp. nov. 2 | Takaka Hill (Nelson) | PQ154922 |
| *Parorchestia* sp. nov. 3 | Teal Valley (Nelson) | PQ154891 |
| *Parorchestia* sp. nov. 4 | Scott’s Beach, Kahurangi (Nelson) | PQ154936 |
| *Parorchestia* sp. nov. 5 | Heaphy Hut East, Kahurangi (Nelson) | PQ154912 |
| *Parorchestia* sp. nov. 6 | Town Belt, Dunedin city (Dunedin) | PQ154931 |
| *Parorchestia* sp. nov. 7 | Lake Roe (Fiordland) | PQ154902 |
| *Parorchestia* sp. nov. 8 | Rakeahua (Stewart Island) | PQ154924 |
| *Parorchestia* sp. nov. 9 | Deadman’s Track (Fiordland) | PQ154941 |
| *Parorchestia* sp. nov. 10 | Borland (Fiordland) | PQ154903 |
| *Parorchestia* sp. nov. 11 | Signal Hill, Dunedin city (Dunedin) | PQ154932 |
| *Puhuruhuru aotearoa* Duncan, 1994 | Broadwood (Northland) | PQ154934 |
| *Puhuruhuru* sp. nov. 1 | Wangapeka Velley (Nelson) | PQ154920 |
| *Puhuruhuru* sp. nov. 2 | Kaituna (Nelson) | PQ154907 |
| *Puhuruhuru* sp. nov. 3 | Maitai Valley (Nelson) | PQ154921 |
| *Puhuruhuru* sp. nov. 4 | Scott’s Beach, Kahurangi (Nelson) | PQ154936 |
| *Sinbadorchestia sinbadensis* (Hurley, 1957) | Homer Cirque (Fiordland) | PQ154901 |
| *Snaresorchestia patersoni* (Stephensen, 1938) | Oamaru (Dunedin) | PQ154900 |
| *Waematau manawatahi* Duncan, 1994 | Great Island (Three Kings Islands) | KU896882 |
| Genus B sp. nov. 1 | Dawson Falls, Mt Taranaki (Taranaki) | PQ154892 |
| Genus B sp. nov. 2 | Maitai Valley (Nelson) | PQ154894 |
| Genus C sp. nov. 1 | Scott’s Beach, Kahurangi (Nelson) | PQ154909 |
| Genus D sp. nov. 1 | Heaphy Hut East, Kahurangi (Nelson) | PQ154910 |
| Genus D sp. nov. 2 | Teal Valley (Nelson) | PQ154923 |
| Genus D sp. nov. 3 | Heaphy Hut East, Kahurangi (Nelson) | PQ154908 |
| Genus E sp. nov. 1 | Secretary Island (Fiordland) | PQ154911 |
| Genus F sp. nov. 1 | Rakeahua (Stewart Island) | PQ154895 |
| Genus F sp. nov. 2 | Rakeahua (Stewart Island) | PQ154925 |
| Genus G sp. nov. 1 | Aorangi Forest (Wairarapa) | PQ154897 |
| Genus H sp. nov. 1 | Mt Cargill (Dunedin) | PQ154928 |
| Genus H sp. nov. 2 | Grebe Valley (Fiordland) | PQ154933 |
| Genus J sp. nov. 1 | Mt Cargill (Dunedin) | PQ154926 |
| Genus J sp. nov. 2 | Mt Cargill (Dunedin) | PQ154929 |
| Genus J sp. nov. 3 | Rakeahua (Stewart Island) | PQ154898 |
| Genus J sp. nov. 4 | Mt Cargill (Dunedin) | PQ154927 |
| Genus K sp. nov. 1 | Secretary Island (Fiordland) | PQ154906 |
| Genus K sp. nov. 2 | Shy Lake (Fiordland) | PQ154905 |
| Genus K sp. nov. 3 | Dawson Falls, Mt Taranaki (Taranaki) | PQ154893 |
| Genus K sp. nov. 4 | Resolution Island (Fiordland) | PQ154904 |
| **Exotic species (all Arcitalitridae)** |  |  |
| *Arcitalitrus dorrieni* (Hunt, 1925) | Maungakaramea, Whangārei (Northland) | PQ154913 |
| *Arcitalitrus sylvaticus* (Haswell, 1879) | Maitai Valley (Nelson) | PQ154918 |
| *Arcitalitrus* sp. 24 | Mission Bay (Auckland) | OQ515321 |
| **Hyalidae (used as outgroup)** |  |  |
| *Apohyale papanuiensis* Kilgallen, 2022 | Waipu (Northland) | PQ154938 |
